# Supplementary material for: External Validation of an MRI-Derived Radiomics Model to Predict Biochemical Recurrence after Surgery for High-Risk Prostate Cancer
Source: PubMed Central journal article supplement (PMC7226108; doi:10.3390/cancers12040814), 2020-03-28

## Supplementary material :

**Supplementary Table 1:** Summary of MRI scan acquisition parameters

| Acquisition parameters             | Siemens 1.5T<br>(Institution 1) | Philips Achieva 3T<br>(Institution 1) | Siemens 1.5T<br>(Institution 2) | Philips 1.5T<br>(Institution 2) |
|------------------------------------|---------------------------------|---------------------------------------|---------------------------------|---------------------------------|
| Number of patients                 | 75                              | 32                                    | 37                              | 51                              |
| Magnetic field strength<br>(Tesla) | 1.5T                            | 3T                                    | 1.5T                            | 1.5T                            |
| T2-Weighted                        |                                 |                                       |                                 |                                 |
| Matrix (pixels)                    | 192 × 192                       | 268 × 268                             | 250 × 250                       | 264 × 264                       |
| Field of view (mm)                 | 250 × 250                       | 320 × 320                             | 256 × 256                       | 320 × 320                       |
| ET (ms)                            | 110                             | 90                                    | 125                             | 110                             |
| RT (ms)                            | 2500                            | 4500                                  | 2000                            | 3500                            |
| Slice Thickness (mm)               | 1.5                             | 1.5                                   | 2                               | 4                               |
| ADC map                            |                                 |                                       |                                 |                                 |
| Matrix (pixels)                    | 128 × 128                       | 144 × 144                             | 192 × 144                       | 68 × 65                         |
| Field of view (mm)                 | 200 × 200                       | 240 × 240                             | 192 × 192                       | 144 × 144                       |
| ET (ms)                            | 80                              | 80                                    | 95                              | 80                              |
| RT (ms)                            | 2300                            | 2300                                  | 2500                            | 4000                            |
| Slice Thickness (mm)               | 3.5                             | 3.5                                   | 3.5                             | 4                               |
| Diffusion gradient                 | B50-400-1000                    | B100-600-1000                         | B50-800                         | B80-200-400-<br>1100            |

Abbreviations: RT: repetition time, ET: echo time

**Supplementary Table 2:** Patients and tumors characteristics of the initial population (Institution 1 + Institution 2)

| Institution                      |             | Institution 1     |                                              |               | Institution 2     |                                              |                    |
|----------------------------------|-------------|-------------------|----------------------------------------------|---------------|-------------------|----------------------------------------------|--------------------|
| Patients characteristics         |             | Selected patients | Excluded patients because of unavailable MRI | p-value       | Selected patients | Excluded patients because of unavailable MRI | p-value            |
| Number of patients               |             | 107               | 30                                           |               | 88                | 277                                          |                    |
| Age at diagnostic (mean.yo)      |             | 65.25             | 64.5                                         | 0.56          | 66.2              | 67.5                                         | 0.09               |
| PSA (mean. ng/mL)                |             | 9.10              | 8.18                                         | 0.50          | 8.47              | 8.84                                         | 0.61               |
| Post-operative tumour status (%) | pT2         | 35.5              | 46.7                                         | 0.37          | 44.3              | 37.5                                         | 0.31               |
|                                  | pT3a-pT3b   | 64.5              | 53.3                                         |               | 55.7              | 62.5                                         |                    |
|                                  | pT4         | 0                 | 0                                            |               | 0                 | 0                                            |                    |
| Nodal status (%)                 | pN0         | 87.8              | 73.3                                         | 0.10          | 96.6              | 96.7                                         | 0.77               |
|                                  | cN0         | 12.2              | 26.7                                         |               | 3.4               | 3.3                                          |                    |
| Surgical margins (%)             | R0          | 40.2              | 33.3                                         | 0.64          | 22.7              | 42.2                                         | <b>0.0015</b>      |
|                                  | R1          | 58.9              | 60                                           | 0.92          | 77.3              | 56.7                                         | <b>0.0008</b>      |
|                                  | Rx          | 0.9               | 6.7                                          | 0.22          | 0                 | 1.1                                          | 0.75               |
| Gleason score (%)                | Gleason ≤ 7 | 85.5              | 85                                           | 0.82          | 83.0              | 82.7                                         | 0.92               |
|                                  | Gleason > 7 | 14.5              | 15                                           |               | 17.0              | 17.3                                         |                    |
| Capra-S Score (median)           |             | 4                 | 4                                            |               | 4                 | 4                                            |                    |
| Number of risk factors           |             | 1                 | 1                                            |               | 1                 | 1                                            |                    |
| Post-operative PSA (mean. ng/mL) |             | 0.012             | 0.017                                        | 0.07          | 0.016             | 0.017                                        | 0.36               |
| bRFS (median. months)            |             | 42.6              | 55.3                                         | 0.06          | 33.0              | 63.1                                         | <b>0.001</b>       |
| Biochemical recurrence (%)       |             | 15.9              | 16.1                                         | 0.49          | 38.6              | 28.5                                         | 0.10               |
| Follow-up (median. months)       |             | 52.0              | 69.4                                         | <b>0.0002</b> | 41.9              | 77.7                                         | <b>&lt; 0.0001</b> |

**Supplementary Table 3: Inter-reader variability assessment - segmentation**

| PatientID   | Hausdorff E1-E2 (mm) | Dice E1 - E2 | Hausdorff E1 - E3 (mm) | Dice E1 - E3 | Hausdorff E2 - E3 (mm) | Dice E2 - E3 |
|-------------|----------------------|--------------|------------------------|--------------|------------------------|--------------|
| Patient#001 | 1.17                 | 0.75         | 0.77                   | 0.8          | 0.68                   | 0.84         |
| Patient#002 | 0.58                 | 0.83         | 0.66                   | 0.8          | 0.3                    | 0.88         |
| Patient#003 | 0.45                 | 0.81         | 0.78                   | 0.77         | 0.45                   | 0.81         |
| Patient#007 | 0.74                 | 0.84         | 0.34                   | 0.92         | 0.88                   | 0.81         |
| Patient#009 | 0.84                 | 0.78         | 1.43                   | 0.68         | 0.77                   | 0.81         |
| Patient#010 | 0.97                 | 0.79         | 0.82                   | 0.81         | 0.53                   | 0.89         |
| Patient#013 | 1.24                 | 0.67         | 1.68                   | 0.56         | 0.73                   | 0.71         |
| Patient#014 | 2.70                 | 0.64         | 2.27                   | 0.66         | 0.55                   | 0.84         |
| Patient#017 | 0.97                 | 0.73         | 0.77                   | 0.76         | 0.37                   | 0.87         |
| Patient#018 | 0.74                 | 0.82         | 1.14                   | 0.76         | 0.75                   | 0.84         |
| Patient#021 | 1.34                 | 0.62         | 0.94                   | 0.70         | 0.35                   | 0.83         |
| Patient#022 | 0.59                 | 0.82         | 0.44                   | 0.81         | 0.63                   | 0.79         |
| Patient#024 | 1.31                 | 0.60         | 0.53                   | 0.69         | 0.89                   | 0.76         |
| Patient#025 | 0.82                 | 0.79         | 0.51                   | 0.84         | 0.47                   | 0.86         |
| Patient#026 | 0.95                 | 0.77         | 0.82                   | 0.80         | 0.54                   | 0.85         |

Abbreviations: E1-3: Expert 1-3, ADC : ADC SZE<sub>GLSZM</sub> value depending on the selected ROI

**Supplementary Table 4:** Inter-reader variability assessment – BCR predictions

| PatientID   | Age (y) | PSA preop | Gleason | PSA postop | TR  | Margins | Capra | Nb risk Factors | ADC E1 | ADC E2 | ADC E3 | BCR | BCR ADC E1 | BCR ADC E2 | BCR ADC E3 |
|-------------|---------|-----------|---------|------------|-----|---------|-------|-----------------|--------|--------|--------|-----|------------|------------|------------|
| Patient#001 | 68      | 7.35      | 4 + 3   | 0.02       | T3a | R0      | 4     | 1               | 0.78   | 0.76   | 0.77   | 0   | 0          | 0          | 0          |
| Patient#002 | 723     | 14.06     | 3 + 4   | 0.01       | T3a | R1      | 6     | 2               | 0.70   | 0.72   | 0.72   | 0   | 0          | 0          | 0          |
| Patient#003 | 65      | 4.90      | 4 + 3   | 0.01       | T3b | R1      | 7     | 2               | 0.75   | 0.74   | 0.72   | 1   | 0          | 0          | 0          |
| Patient#007 | 701     | 7.65      | 5 + 5   | 0.01       | T2c | R0      | 4     | 1               | 0.51   | 0.51   | 0.51   | 1   | 1          | 1          | 1          |
| Patient#009 | 67      | 7.50      | 4 + 3   | 0.03       | T3a | R1      | 6     | 2               | 0.65   | 0.63   | 0.54   | 1   | 0          | 0          | 0          |
| Patient#010 | 61      | 6.60      | 3 + 4   | 0.01       | T2c | R1      | 4     | 1               | 0.64   | 0.67   | 0.69   | 0   | 0          | 0          | 0          |
| Patient#013 | 73      | 10.00     | 4 + 4   | 0.01       | T2c | R1      | 6     | 2               | 0.47   | 0.44   | 0.43   | 1   | 1          | 1          | 1          |
| Patient#014 | 71      | 6.09      | 3 + 4   | 0.01       | T3a | R0      | 3     | 1               | 0.76   | 0.74   | 0.76   | 0   | 0          | 0          | 0          |
| Patient#017 | 54      | 4.20      | 3 + 4   | 0.03       | T2c | R1      | 3     | 1               | 0.41   | 0.39   | 0.41   | 1   | 1          | 1          | 1          |
| Patient#018 | 65      | 14.00     | 3 + 3   | 0.01       | T2c | R1      | 4     | 1               | 0.68   | 0.67   | 0.70   | 0   | 0          | 0          | 0          |
| Patient#021 | 63      | 7.99      | 3 + 4   | 0.01       | T3a | R0      | 3     | 1               | 0.43   | 0.40   | 0.40   | 1   | 1          | 1          | 1          |
| Patient#022 | 71      | 7.50      | 4 + 4   | 0.02       | T3a | R0      | 5     | 2               | 0.74   | 0.71   | 0.72   | 0   | 0          | 0          | 0          |
| Patient#024 | 63      | 9.40      | 4 + 3   | 0.02       | T3a | R1      | 6     | 2               | 0.81   | 0.82   | 0.81   | 0   | 0          | 0          | 0          |
| Patient#025 | 59      | 7.95      | 4 + 3   | 0.02       | T3a | R0      | 4     | 1               | 0.77   | 0.76   | 0.76   | 0   | 0          | 0          | 0          |
| Patient#026 | 62      | 8.30      | 5 + 5   | 0.01       | T3b | R1      | 9     | 3               | 0.73   | 0.73   | 0.73   | 0   | 0          | 0          | 0          |

Abbreviations: BCR: Biochemical Recurrence ground-truth. PSA: Prostate Specific Antigen. Preop: pre-operative. Postop: post-operative. E1-3: Expert 1-3. ADC : ADC SZE<sub>GLSZM</sub> value depending on the selected delineated volume of interest.

**Supplementary Table 5 : Radiomics Quality Score**

| Item                                                                                                                                                                                                                                                                     | Points                                                                                                                                 | Current Study |
|--------------------------------------------------------------------------------------------------------------------------------------------------------------------------------------------------------------------------------------------------------------------------|----------------------------------------------------------------------------------------------------------------------------------------|---------------|
| Image protocol quality – well-documented image protocols (e.g., contrast, slice thickness, energy, etc.) and/or usage of public image protocols allow reproducibility/replicability                                                                                      | +1 (if protocols are well-documented)+1 (if public protocol is used)                                                                   | 2             |
| Multiple segmentations – possible actions are: segmentation by different physicians/algorithms/software, perturbing segmentations by (random) noise, segmentation at different breathing cycles. Analyze feature robustness to segmentation variabilities                | +1                                                                                                                                     | 1             |
| Phantom study on all scanners – detect inter-scanner differences and vendor-dependent features. Analyze feature robustness to these sources of variability                                                                                                               | +1                                                                                                                                     | 0             |
| Imaging at multiple time points – collect individuals’ images at additional time points. Analyze feature robustness to temporal variabilities (e.g., organ movement, organ expansion/shrinkage).                                                                         | +1                                                                                                                                     | 0             |
| Feature reduction or adjustment for multiple testing – decreases the risk of overfitting. Overfitting is inevitable if the number of features exceeds the number of samples. Consider feature robustness when selecting features                                         | –3 (if neither measure is implemented)+3 (if either measure is implemented)                                                            | 3             |
| Multivariable analysis with non radiomic features (e.g., EGFR mutation) – is expected to provide a more holistic model. Permits correlating/inferencing between radiomics and non radiomics features                                                                     | +1                                                                                                                                     | 1             |
| Detect and discuss biological correlates – demonstration of phenotypic differences (possibly associated with underlying gene–protein expression patterns) deepens understanding of radiomics and biology                                                                 | +1                                                                                                                                     | 0             |
| Cut-off analyses – determine risk groups by either the median, a previously published cut-off or report a continuous risk variable. Reduces the risk of reporting overly optimistic results                                                                              | +1                                                                                                                                     | 1             |
| Discrimination statistics – report discrimination statistics (e.g., C-statistic, ROC curve, AUC) and their statistical significance (e.g., p-values, confidence intervals). One can also apply resampling method (e.g., bootstrapping, cross-validation)                 | +1 (if a discrimination statistic and its statistical significance are reported)+1 (if also an resampling method technique is applied) | 1             |
| Calibration statistics – report calibration statistics (e.g., Calibration-in-the-large/slope, calibration plots) and their statistical significance (e.g., p-values, confidence intervals). One can also apply resampling method (e.g., bootstrapping, cross-validation) | +1 (if a calibration statistic and its statistical significance are reported)+1 (if also an resampling method technique is applied)    | 1             |

|                                                                                                                                                                                                                                    |                                                                                                                                                                                                                                                                                                                                                                                                                                                                            |    |
|------------------------------------------------------------------------------------------------------------------------------------------------------------------------------------------------------------------------------------|----------------------------------------------------------------------------------------------------------------------------------------------------------------------------------------------------------------------------------------------------------------------------------------------------------------------------------------------------------------------------------------------------------------------------------------------------------------------------|----|
| Prospective study registered in a trial database – provides the highest level of evidence supporting the clinical validity and usefulness of the radiomics biomarker                                                               | +7 (for prospective validation of a radiomics signature in an appropriate trial)                                                                                                                                                                                                                                                                                                                                                                                           | 0  |
| Comparison to ‘gold standard’ – assess the extent to which the model agrees with/is superior to the current ‘gold standard’ method (e.g.. TNM-staging for survival prediction). This comparison shows the added value of radiomics | –5 (if validation is missing)+2 (if validation is based on a dataset from the same institute)+3 (if validation is based on a dataset from another institute)+4 (if validation is based on two datasets from two distinct institutes)+4 (if the study validates a previously published signature)+5 (if validation is based on three or more datasets from distinct institutes)*Datasets should be of comparable size and should have at least 10 events per model feature. | 4  |
| Potential clinical utility – report on the current and potential application of the model in a clinical setting (e.g.. decision curve analysis)                                                                                    | +2                                                                                                                                                                                                                                                                                                                                                                                                                                                                         | 2  |
| Cost-effectiveness analysis – report on the cost-effectiveness of the clinical application (e.g.. quality adjusted life years generated)                                                                                           | +2                                                                                                                                                                                                                                                                                                                                                                                                                                                                         | 2  |
| Open science and data – make code and data publicly available. Open science facilitates knowledge transfer and reproducibility of the study                                                                                        | +1                                                                                                                                                                                                                                                                                                                                                                                                                                                                         | 0  |
| Comparison to ‘gold standard’ – assess the extent to which the model agrees with/is superior to the current ‘gold standard’ method (e.g.. TNM-staging for survival prediction). This comparison shows the added value of radiomics | +1 (if scans are open source)+1 (if region of interest segmentations are open source)+1 (if code is open source)+1 (if radiomics features are calculated on a set of representative ROIs and the calculated features + representative ROIs are open source)                                                                                                                                                                                                                | 0  |
| Total                                                                                                                                                                                                                              | 36                                                                                                                                                                                                                                                                                                                                                                                                                                                                         | 18 |

**Supplementary Figure 1: Receiver operating characteristic (ROC) curves without Combat Harmonization Method**

- A: clinical model - training**
- B: radiomic model - training**
- C: clinical – radiomic model - training**

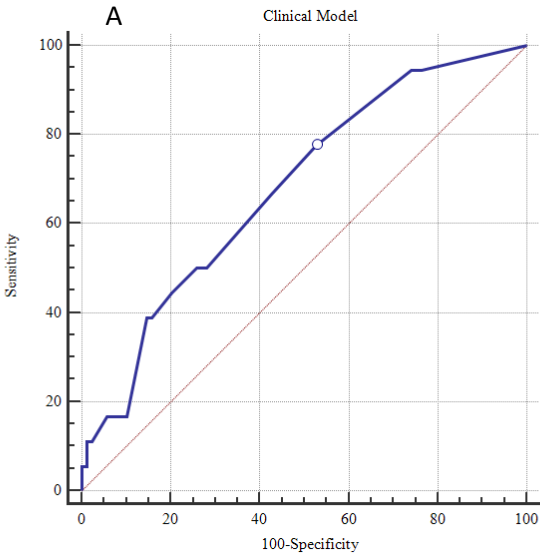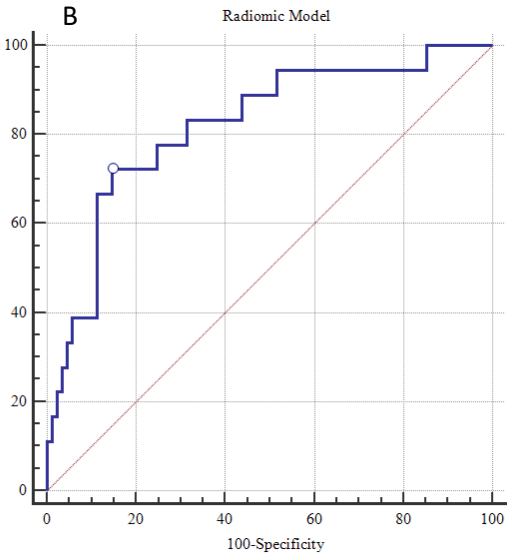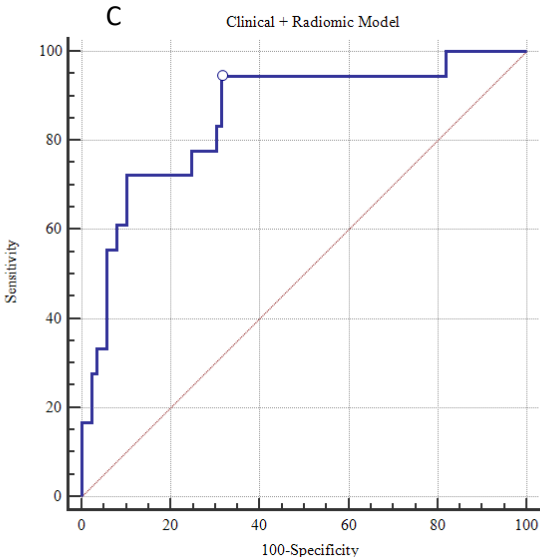

**Supplementary Figure 2: Receiver operating characteristic (ROC) curves after Combat Harmonization Method**

**A:** radiomic model – training

**C:** radiomic model – testing

**B:** clinical – radiomic model – training

**D:** clinical – radiomic model - testing

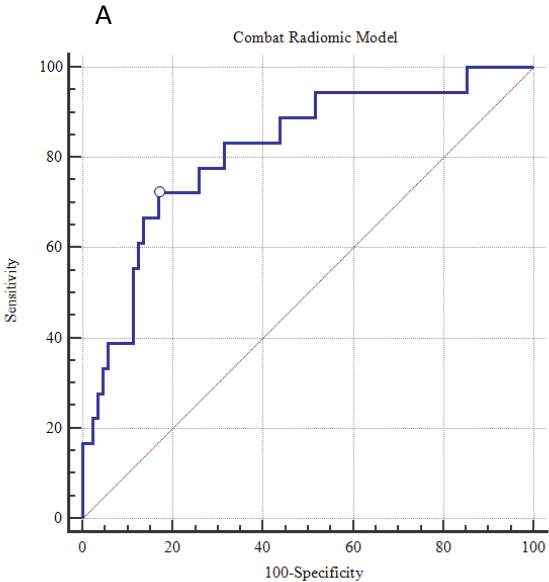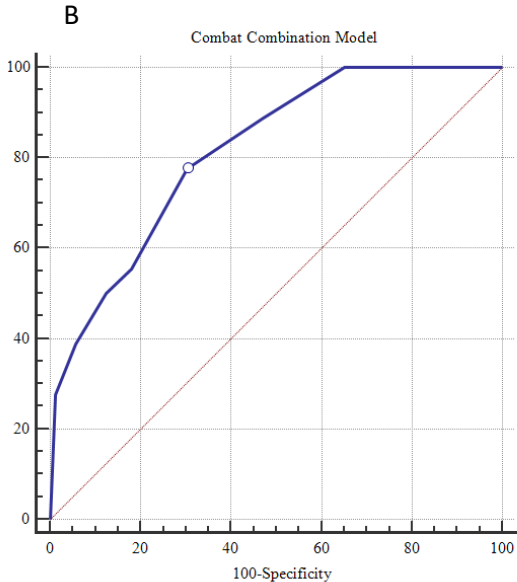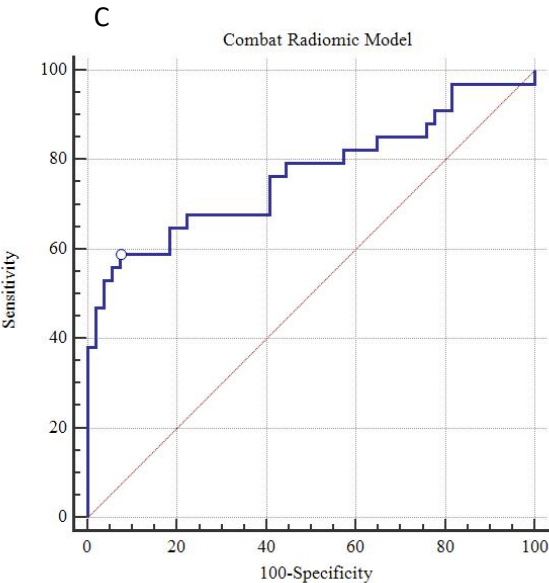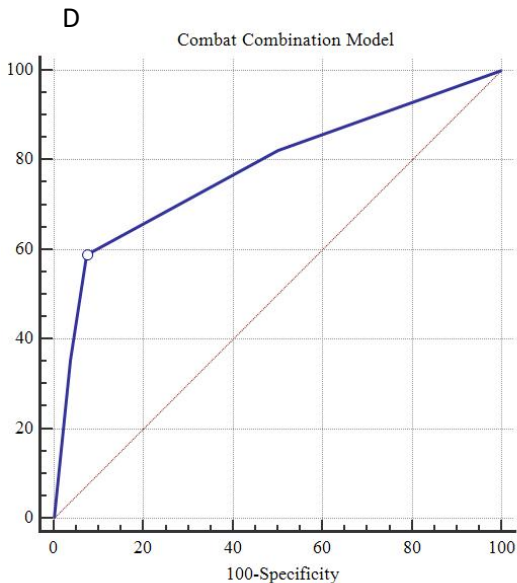



**Supplementary Figure 3:** Kaplan-Meier estimates of biochemical relapse free survival using the “Combat” radiomic model in the training (a) and testing (b) cohorts.

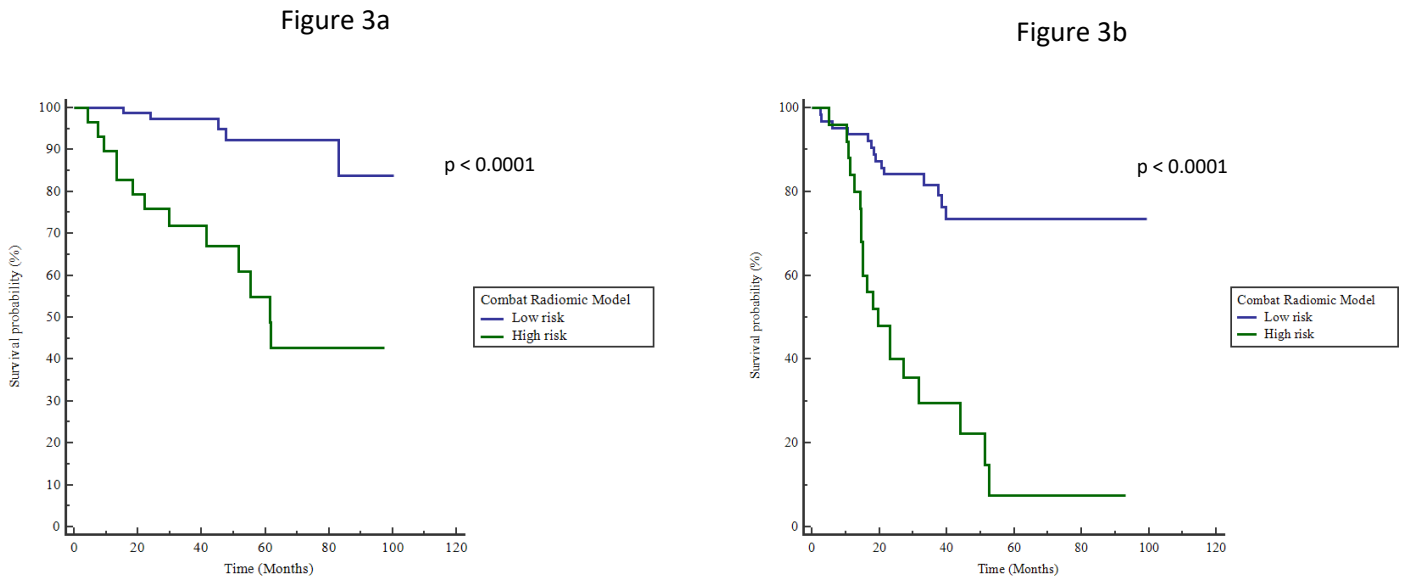

**Supplementary Figure 4:** Kaplan-Meier estimates of biochemical relapse free survival using the “Combat” clinical-radiomic model in the training (a) and testing (b) cohorts.

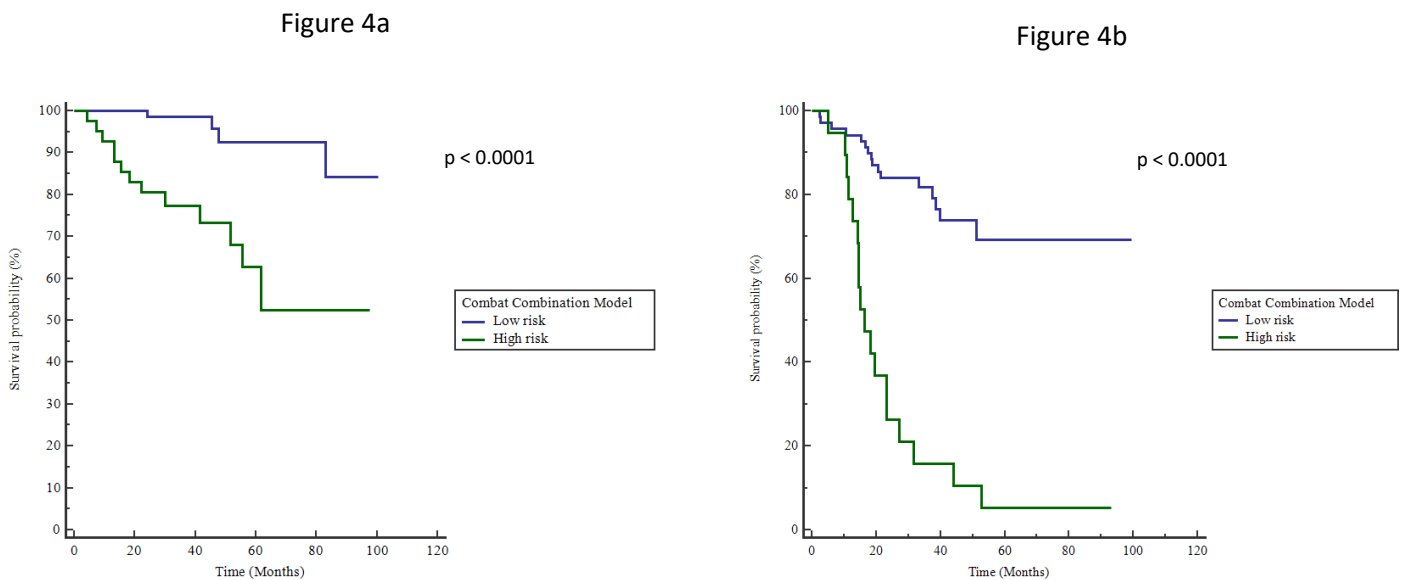

Supplement: cancers-12-00814-s001.pdf [file cancers-12-00814-s001.pdf]
